# Supplementary material
Source: publisher figshare collection journal article supplement (https://aacr.figshare.com/articles/dataset/_/22454684)
Supplement: Supplementary file 1 [file 39905801]

## **Supplemental Figure legends**

### **Supplementary Figure S1: Schematic presentation of patients with HCC.**

HCC, hepatocellular carcinoma.

### **Supplementary Figure S2: One way hierarchical clustering of 122 genes involved in the gene set differentially expressed in HCC-infiltrating mononuclear inflammatory cells of 20 patients with the *IL28B* genotype.**

Most of the 122 genes were expressed at high levels in many HCC tissues of *IL28B* TG/GG genotype patients.

HCC, hepatocellular carcinoma.

### **Supplementary Figure S3: Kaplan-Meier curves of time to late recurrence**

**(>1year) survival in relation to *IL28B* genotype.**

*IL28B* TT genotype patients showed a shorter time to recurrence than *IL28B* TG/GG genotype patients although this did not reach statistical significance ( $p=0.11$ ).

### **Supplementary Figure S4: One way hierarchical clustering of 14 intratumoral immune genes of 20 patients with the *IL28B* genotype.**

The expression of 14 intratumoral immune genes was higher in TG/GG genotype than TT genotype patients

HCC, hepatocellular carcinoma.
